# Supplementary material for: Efficacy of Transarterial Chemoembolization Combined with Tyrosine Kinase Inhibitors for Hepatocellular Carcinoma Patients with Portal Vein Tumor Thrombus: A Systematic Review and Meta-Analysis
Source: MDPI journal article supplement (doi:10.3390/curroncol30010096), 2023-01-16
Supplement: s1 [file s1]

Supplementary Material Table S1:The characteristics of the combined therapy

| Study                 | TKI agents                                                                   | NO. TKI (months)                                   | Chemotherapeutic agents                             | NO.TACE                            |
|-----------------------|------------------------------------------------------------------------------|----------------------------------------------------|-----------------------------------------------------|------------------------------------|
| Fan et al.2019 [31]   | Apatinib:500 mg qd                                                           | NA                                                 | 300 mg carboplatin                                  | NA                                 |
| Shen et al. 2020 [32] | Apatinib:500 mg qd                                                           | 3.7                                                | 30–50 mg lobaplatin,30–50 pirarubicin               | NA                                 |
| Sun et al. 2022 [33]  | Apatinib:500mg qd                                                            | 11.4 (95%CI:9.8–13.)                               | 10–40mg doxorubicin hydrochloride                   | NA                                 |
| Wang et al. 2016 [34] | Sorafenib:400mg bid                                                          | NA                                                 | 20–60mg doxorubicin hydrochloride,<br>5mg cisplatin | NA                                 |
| Yuan et al. 2019 [35] | Sorafenib:400 mg bid                                                         | NA                                                 | 1.0 g 5-fluorouracil<br>150 mg oxaplatin            | Mean 3times<br>(range1–11)         |
| Zhu et al. 2014 [36]  | Sorafenib:400mg bid                                                          | 11.0 (95%CI:8.2–13.8)                              | 20–60 mg Doxorubicin<br>20–50 mg lobaplatin         | Mean3.6 times<br>(range1–8)        |
| Ding et al. 2021 [37] | Sorafenib:400 mg bid<br>lenvatinib:≤60 kg/ Child B<br>8 mg qd:≥60kg,12 mg qd | T+L:6.9(range1.3–20)<br>T+S:3.0(range1.1–12.6<br>) | 50 mg epirubicin                                    | NA                                 |
| Yang et al. 2021 [38] | Lenvatinib:8 mg qd<br>Sorafenib: 400 mg bid                                  | NA                                                 | 40–45 mg epirubicin                                 | T+L:2.09 ±0.198<br>T+S:2.03 ±0.118 |

TKI: tyrosine kinase inhibitor; T: transarterial chemoembolization(TACE); S:sorafenib; L: lenvatinib; NA: not applicable; NO: number; qd: once a day; bid: twice a day.

Supplementary Material Table S2:Efficacy of hepatocellular carcinoma with portal vein tumor thrombus

| Study                   | Treatment | Tumor response |    |    |    | ORR (%) | DCR (%) | 6-month Survival rate (%) | 1-year Survival rate (%) | Median OS (months) (95%CI) | Median TTP (months) (95%CI) |
|-------------------------|-----------|----------------|----|----|----|---------|---------|---------------------------|--------------------------|----------------------------|-----------------------------|
|                         |           | CP             | PR | SD | PD |         |         |                           |                          |                            |                             |
| Fan et al. 2019 [31]    | T+A       | 0              | 24 | 26 | 35 | 28.2    | 59      | 76.4                      | 29.4                     | 12(10.3–13.7)              | 6.1(4.9;7.3)                |
|                         | T         | 0              | 4  | 10 | 89 | 3.9     | 14      | 60.2                      | 7.8                      | 7(6.4–7.6)                 | 3.7(3.1–4.4)                |
| Shen et al. 2020 [32]   | T+A       | NA             | NA | NA | NA | NA      | NA      | 85.7                      | 63.6                     | 18.2                       | NA                          |
|                         | T         | NA             | NA | NA | NA | NA      | NA      | 60.9                      | 40.6                     | 7.1                        | NA                          |
| Sun et al. 2022 [33]    | T+A       | NA             | NA | NA | NA | 30.2    | 58.5    | 86.7                      | 58.5                     | 15                         | 7                           |
|                         | T         | NA             | NA | NA | NA | 10.7    | 28.6    | 57.5                      | 14.2                     | 7                          | 3                           |
| Wang, et al.. 2016 [34] | T+S       | NA             | NA | NA | NA | NA      | NA      | 67.9                      | 37.36                    | 8.92(7.86–10.97)           | NA                          |
|                         | T         | NA             | NA | NA | NA | NA      | NA      | 41.6                      | 24.16                    | 4.79(4.07–5.45)            | NA                          |
| Yuan et al. 2019 [35]   | T+S       | NA             | NA | NA | NA | NA      | NA      | 86.9                      | 46.7                     | 13.0(9.2–16.8)             | NA                          |
|                         | T         | NA             | NA | NA | NA | NA      | NA      | 55.5                      | 22.57                    | 6.0(5.4–6.6)               | NA                          |
| Zhu et al. 2014 [36]    | T+S       | 0              | 13 | 13 | 20 | 28.3    | 57      | 82.6                      | 45.7                     | 11.0(7.8–14.2)             | 6.0(4.9–7.1)                |
|                         | T         | 0              | 2  | 4  | 39 | 4.4     | 13      | 60.0                      | 17.8                     | 6.0 (4.9–7.1)              | 3.0(2.2–3.8)                |
| Ding et al. 2021 [37]   | T+L       | NA             | NA | NA | NA | NA      | NA      | 93.5                      | 54.1                     | 14.5(8.4–20.6)             | 4.7( 2.0–7.4)               |
|                         | T+S       | NA             | NA | NA | NA | NA      | NA      | 82.0                      | 45.0                     | 10.8 (7.7–13.9)            | 3.1(2.7–3.5)                |
| Yang et al. 2021 [38]   | T+L       | 6              | 28 | 20 | 2  | 60.7    | 96.4    | 81.4                      | 40.7                     | 16.4(10.9;21.8)            | 8.4(7.07–15.2)              |
|                         | T+S       | 3              | 18 | 31 | 2  | 38.9    | 96.3    | 78.9                      | 40.4                     | 12.7(10.8;17.9)            | 7.43(5.63–9.03)             |

CR: complete response; PR: partial response; SD: stable disease; PD: progressive disease; ORR: CR+PR DCR; CDR: CR+PR+SD

OS: overall survival; TTP: time to progression; T:transarterial chemoembolization(TACE); S:sorafenib; A:apatinib; L: lenvatinib; NA: not applicable.

Supplementary Material Table S3:Adverse events

| Adverse events                     | Fan et al.2019 [31] | Shen et al.2020 [32] | Sun et al. 2022 [33] | Wang et al. 2016 [34] | Yuan et al. 2019 [35] | Zhu et al. 2014 [36] | Ding et al. 2021 [37] |           | Yang et al. 2021 [38] |           | Total |
|------------------------------------|---------------------|----------------------|----------------------|-----------------------|-----------------------|----------------------|-----------------------|-----------|-----------------------|-----------|-------|
|                                    |                     |                      |                      |                       |                       |                      | T+L                   | T+S       | T+L                   | T+S       |       |
| HFSR (n/%)                         | 45 (52.9)           | 27 (67.5)            | 44 (83)              | NA                    | NA                    | 37 (80)              | 4 (12.5)              | 8 (25)    | 10 (17.5)             | 16 (30.7) | 191   |
| Hemorrhage of digestive tract(n/%) | 1 (1.2)             | NA                   | 4 (7.5)              | NA                    | NA                    | 4 (9)                | NA                    | NA        | 5 (8.7)               | 3 (5.8)   | 17    |
| Diarrhea(n/%)                      | 1 (22.1)            | 9 (22)               | 10 (18.9)            | NA                    | NA                    | 33 (72)              | 13 (40.6)             | 10 (31.3) | 10 (17.5)             | 13 (24.8) | 99    |
| Hypertension(n/%)                  | 43 (50.6)           | 13 (32.5)            | 24 (45.3)            | NA                    | NA                    | 6 (13)               | 19 (59.4)             | 11 (34.4) | 8 (14.0)              | 4 (7.7)   | 128   |
| Fatigue(n/%)                       | 8 (9.4)             | 5 (12.5)             | 6 (11.3)             | NA                    | NA                    | 13 (28)              | 18 (56.3)             | 14 (43.8) | NA                    | NA        | 64    |
| Liver dysfunction (n/%)            | NA                  | NA                   | NA                   | NA                    | NA                    | NA                   | 28(87.5)              | 29 (90.6) | 7 (12.2)              | 4 (7.7)   | 49    |
| Rash/Desquamation (n/%)            | NA                  | NA                   | NA                   | NA                    | NA                    | NA                   | 4 (12.5)              | 11 (34.4) | 3(5.2)                | 4 (7.7)   | 22    |
| Oral ulcer(n/%)                    | 14 (16.5)           | 5 (12.5)             | 3 (5.7)              | NA                    | NA                    | NA                   | NA                    | NA        | 4 (7.0)               | 1 (1.9)   | 27    |
| Voice change(n/%)                  | 10 (11.8)           | 5 (12.5)             | 3 (5.7)              | NA                    | NA                    | 1(2)                 | 8 (25)                | 1 (3.2)   | 1 (1.7)               | 1 (1.9)   | 30    |
| Proteinuria(n/%)                   | 26 (30.6)           | 17 (42.5)            | 10 (18.9)            | NA                    | NA                    | NA                   | 10 (31.3)             | 4 (6.3)   | NA                    | NA        | 67    |
| Headache (n/%)                     | 18 (21.2)           | NA                   | NA                   | NA                    | NA                    | NA                   | NA                    | NA        | NA                    | NA        | 18    |
| cough/fever(n/%)                   | 16 (18.8)           | NA                   | NA                   | NA                    | NA                    | NA                   | 23 (71.9)             | 16 (50.0) | NA                    | NA        | 55    |
| Nausea(n/%)                        | NA                  | NA                   | NA                   | NA                    | NA                    | NA                   | 25 (78.1)             | 18 (56.5) | 8 (14.0)              | 4 (7.7)   | 55    |
| Anemia (n/%)                       | 8 (9.4)             | NA                   | NA                   | NA                    | NA                    | NA                   | 12 (37.5)             | 3 (9.6)   | NA                    | 1 (1.9)   | 24    |

|                                         |           |       |       |    |    |        |           |           |       |       |          |
|-----------------------------------------|-----------|-------|-------|----|----|--------|-----------|-----------|-------|-------|----------|
| Abdominal pain(n/%)                     | 21 (24.7) | NA    | NA    | NA | NA | NA     | 23 (71.9) | 14 (43.6) | NA    | NA    | 58       |
| Adverse events<br>(grade3or4/any grade) | 39/238    | 19/76 | 7/104 | NA | NA | 16/110 | 38/350    | 35/256    | 13/57 | 10/52 | 176/1243 |

HFSR: hand-foot skin reaction. T:transarterial chemoembolization(TACE); S:sorafenib; L: lenvatinib; NA: not applicable.

Supplementary Material Table S4: The outcomes of patients treated with transarterial chemoembolization and tyrosine kinase inhibitors combination therapy for various types of portal vein tumor thrombus.

| Study                 | Treatment | Type of PVTT | Patients | Median TTP (months) | Median OS (months) | DCR (%) |
|-----------------------|-----------|--------------|----------|---------------------|--------------------|---------|
| Fan et al. 2019 [31]  | T+A       | Type I       | 18       | 8.3                 | 13.7               | 83      |
|                       |           | Type II      | 51       | 6.9                 | 12.2               | 59      |
|                       |           | Type III     | 16       | 1.2                 | 5.4                | 13      |
|                       | T         | Type I       | 19       | 4.6                 | 7.2                | 26      |
|                       |           | Type II      | 54       | 4.2                 | 7.5                | 15      |
|                       |           | Type III     | 30       | 2.3                 | 4.5                | 3       |
| Wang et al. 2016 [34] | T+S       | Type I       | 31       | NA                  | 12.010             | NA      |
|                       |           | Type II      | 45       | NA                  | 8.920              | NA      |
|                       |           | Type III     | 37       | NA                  | 6.960              | NA      |
|                       | T         | Type I       | 47       | NA                  | 9.280              | NA      |
|                       |           | Type II      | 288      | NA                  | 4.900              | NA      |
|                       |           | Type III     | 269      | NA                  | 3.980              | NA      |
| Zhu et al. 2014 [36]  | T+S       | Type I       | 17       | 7                   | 15                 | 82      |
|                       |           | Type II      | 19       | 6                   | 13                 | 58      |
|                       |           | Type III     | 20       | 0                   | 3                  | 10      |
|                       | T         | Type I       | 13       | 5                   | 10                 | 23      |
|                       |           | Type II      | 21       | 3                   | 6                  | 14      |

|  |  |          |    |   |   |   |
|--|--|----------|----|---|---|---|
|  |  | Type III | 10 | 0 | 3 | 0 |
|--|--|----------|----|---|---|---|

PVTT: portal vein tumor thrombus; TTP: time to progression; OS: overall survival; DCR: disease control rate; T:transarterial chemoembolization(TACE);  
A:apatinib;S:sorafenib; NA: not applicable.
